# Supplementary material for: Effects of Organic Biostimulants Added with Zeolite on Zucchini Squash Plants Infected by Tomato Leaf Curl New Delhi Virus
Source: MDPI journal article supplement (doi:10.3390/v14030607), 2022-03-15
Supplement: s1 [file s1]

**Table S1. Peak Assignment of Metabolites Identified on Zucchini extracts by  $^1\text{H}$ -NMR**

| Compound <sup>a</sup>                 | Assignment <sup>b</sup> | $^1\text{H}$ $\delta$<br>(ppm) | Multiplicity <sup>c</sup> | $^{13}\text{C}$ $\delta$ (ppm) |
|---------------------------------------|-------------------------|--------------------------------|---------------------------|--------------------------------|
| <b><u>Organic acids</u></b>           |                         |                                |                           |                                |
| Acetic acid (AA)                      | CH <sub>3</sub>         | 1.92                           | <b>s</b>                  | 25.98                          |
| Citric acid (CA)                      | $\alpha,\gamma$ -CH     | 2.67                           | d                         | 44.77                          |
|                                       | $\alpha',\gamma'$ -CH   | 2.71                           | d                         | 44.77                          |
| <b>Chlorogenic acid<br/>(CGA)</b>     | CH <sub>2</sub> -2'     | 2.02,2.17                      | m                         | 40.11                          |
|                                       | CH-3'                   | 5.33                           | m                         | 40.14                          |
|                                       | CH-4'                   | 3.88                           | dd                        | 75.43                          |
|                                       | CH-5'                   | 4.23                           | m                         | 72.93                          |
|                                       | <b>CH-8</b>             | <b>6.39</b>                    | <b>d</b>                  | 73.82                          |
|                                       | CH-7                    | 6.94                           | d                         | 117.56                         |
|                                       | CH-2                    | 7.12                           | dd                        | 118.90                         |
|                                       | CH-5                    | 7.19                           | d                         | 117.81                         |
|                                       | CH-6                    | 7.65                           | d                         | 149.59                         |
| <b>Formic acid (FA)</b>               | <b>CH</b>               | <b>8.46</b>                    | <b>s</b>                  | 171.90                         |
| Fumaric acid (FumA)                   | CH=CH                   | 6.51                           | s                         | 137.94                         |
| Lactic acid (LA)                      | CH <sub>3</sub>         | 1.32                           | d                         | 22.95                          |
|                                       | CH                      | 4.11                           | q                         | 77.04                          |
| <b>Malic acid (MA)</b>                | $\alpha$ - CH           | <b>4.31</b>                    | <b>dd</b>                 | 69.33                          |
|                                       | $\beta,\beta'$ - CH     | 2.38,2.69                      | dd                        | 40.86                          |
| <b>Neochlorogenic acid<br/>(nCGA)</b> | CH <sub>2</sub> -2'     | 1.92,2.09                      | m                         | 40.11                          |
|                                       | CH-3'                   | 4.04                           | dd                        | 75.43                          |
|                                       | CH-4'                   | 3.61                           | dd                        | 72.93                          |
|                                       | CH-5'                   | 5.35                           | m                         | 43.23                          |
|                                       | CH <sub>2</sub> -6'     | 2.09,2.23                      | m                         | 40.14                          |
|                                       | <b>CH-8</b>             | <b>6.43</b>                    | <b>d</b>                  | 115.95                         |
|                                       | CH-7                    | 7.66                           | d                         | 117.56                         |
|                                       | CH-2                    | 7.22                           | d                         | 118.90                         |
|                                       | CH-5                    | 6.96                           | dd                        | 117.81                         |

|                            |                             |             |           |              |
|----------------------------|-----------------------------|-------------|-----------|--------------|
|                            | CH-6                        | 6.15        | d         | 149.59       |
| Succinic acid (SA)         | 2 CH <sub>2</sub>           | 2.39        | s         | 36.31        |
| <b><u>Amino acids</u></b>  |                             |             |           |              |
| <b>Alanine (Ala)</b>       | <b>β-CH<sub>3</sub></b>     | <b>1.49</b> | <b>d</b>  | 19.05        |
|                            | α- CH                       | 3.80        | q         | 53.56        |
| <b>Arginine (Arg)</b>      | γ- CH <sub>2</sub>          | 1.69        | m         | 30.51        |
|                            | β- CH <sub>2</sub>          | 1.95        | m         | 43.27        |
|                            | <b>δ- CH<sub>2</sub></b>    | <b>3.21</b> | <b>t</b>  | 43.12        |
|                            | α- CH <sub>2</sub>          | 3.78        | t         | 57.32        |
| <b>Aspartic acid (Asp)</b> | <b>β'-CH</b>                | <b>2.68</b> | <b>dd</b> | 39.31        |
|                            | β-CH                        | 2.72        | dd        | 39.31        |
|                            | α-CH                        | 3.91        | m         | 55.09        |
| <b>Asparagine (Asn)</b>    | β'-CH                       | 2.86        | dd        | 37.44        |
|                            | <b>β-CH</b>                 | <b>2.89</b> | <b>dd</b> | 37.44        |
|                            | α-CH                        | 4.01        | m         | 54.09        |
| <b>Glutamate (Glu)</b>     | γ- CH <sub>2</sub>          | 2.07        | m         | 29.25        |
|                            | <b>β,β-CH<sub>2</sub></b>   | <b>2.35</b> | <b>m</b>  | 37.12        |
|                            | α-CH                        | 3.78        | m         | 58.01        |
| <b>Glutamine (Gln)</b>     | γ- CH <sub>2</sub>          | 2.11        | m         | 29.31        |
|                            | <b>β,β-CH<sub>2</sub></b>   | <b>2.45</b> | <b>m</b>  | 34.02        |
|                            | α-CH                        | 3.81        | m         | 57.19        |
| <b>Histidine (His)</b>     | CH-6                        | 3.19        | dd        | 30.25        |
|                            | CH-7                        | 3.99        | dd        | 57.29        |
|                            | CH-5                        | 7.09        | d         | 120.03       |
|                            | <b>CH-2</b>                 | <b>8.01</b> | <b>d</b>  | 138.31       |
| <b>Isoleucine (Ile)</b>    | δ-CH <sub>3</sub>           | 0.95        | t         | 13.85        |
|                            | <b>γ-CH<sub>3</sub></b>     | <b>1.02</b> | <b>d</b>  | 17.38        |
|                            | γ'-CH                       | 1.25        | m         | 27.01        |
|                            | γ''-CH                      | 1.49        | m         | 27.01        |
|                            | β-CH                        | 1.99        | m         | 38.71        |
|                            | α-CH                        | 3.69        | m         | 63.04        |
| <b>Leucine (Leu)</b>       | <b>δ,δ'- CH<sub>3</sub></b> | <b>0.97</b> | <b>m</b>  | 23.85, 24.59 |

|                                                            |                                            |             |          |       |
|------------------------------------------------------------|--------------------------------------------|-------------|----------|-------|
|                                                            | $\gamma$ -CH                               | 1.72        | m        | 26.81 |
|                                                            | $\beta$ -CH <sub>2</sub>                   | 1.73        | m        | 42.60 |
|                                                            | $\alpha$ -CH                               | 3.74        | m        | 56.21 |
| <b><math>\gamma</math>-aminobutyric acid (GABA)</b>        | <b><math>\beta</math>-CH<sub>2</sub></b>   | <b>1.95</b> | <b>t</b> | 26.38 |
|                                                            | $\gamma$ -CH <sub>2</sub>                  | 2.30        | m        | 37.06 |
|                                                            | $\alpha$ -CH <sub>2</sub>                  | 3.01        | t        | 42.21 |
| <b>Phenylalanine (Phe)</b>                                 | CH-2,6                                     | 7.32        | d        | 130.3 |
|                                                            | CH-4                                       | 7.38        | d        | 128.6 |
|                                                            | <b>CH-3,5</b>                              | <b>7.42</b> | <b>d</b> | 130.3 |
|                                                            | $\beta$ -CH <sub>2</sub>                   | 3.27        | m        | 37.1  |
|                                                            | $\alpha$ -CH                               | 3.98        | dd       | 56.8  |
| <b>Threonine (Thr)</b>                                     | <b><math>\gamma</math>-CH<sub>3</sub></b>  | <b>1.33</b> | <b>d</b> | 22.15 |
|                                                            | $\alpha$ -CH                               | 3.60        | m        | 63.46 |
|                                                            | $\beta$ -CH                                | 4.27        | m        | 68.94 |
| <b>Tyrosine (Tyr)</b>                                      | CH-2,6                                     | 7.22        | d        | 130.0 |
|                                                            | <b>CH-3,5</b>                              | <b>7.08</b> | <b>d</b> | 117.0 |
|                                                            | $\beta$ -CH <sub>2</sub>                   | 3.15        | dd       | 37.1  |
|                                                            | $\alpha$ -CH                               | 3.93        | dd       | 56.8  |
| <b>Valine (Val)</b>                                        | $\gamma$ -CH <sub>3</sub>                  | 0.99        | d        | 19.41 |
|                                                            | <b><math>\gamma'</math>-CH<sub>3</sub></b> | <b>1.05</b> | <b>d</b> | 20.75 |
|                                                            | $\beta$ -CH                                | 2.29        | m        | 31.89 |
|                                                            | $\alpha$ -CH                               | 3.62        | m        | 63.36 |
| <b><u>Carbohydrates</u></b>                                |                                            |             |          |       |
| <b><math>\alpha</math>-Glucose (<math>\alpha</math>-G)</b> | <b>CH-1</b>                                | <b>5.25</b> | <b>d</b> | 93.10 |
|                                                            | CH-2                                       | 3.55        | m        | 72.49 |
|                                                            | CH-3                                       | 3.72        | m        | 73.84 |
|                                                            | CH-4                                       | 3.42        | m        | 70.67 |
|                                                            | CH-5                                       | 3.84        | m        | 72.52 |
|                                                            | CH <sub>2</sub> -6                         | 3.73, 3.90  | m        | 96.97 |
| <b><math>\beta</math>-Glucose (<math>\beta</math>-G)</b>   | <b>CH-1</b>                                | <b>4.69</b> | <b>d</b> | 96.97 |
|                                                            | CH-2                                       | 3.26        | m        | 75.17 |
|                                                            | CH-3                                       | 3.50        | m        | 76.84 |
|                                                            | CH-4                                       | 3.42        | m        | 70.70 |

|                       |                         |             |          |        |
|-----------------------|-------------------------|-------------|----------|--------|
|                       | CH-5                    | 3.48        | m        | 74.57  |
|                       | CH <sub>2</sub> -6      | 3.74, 3.91  | m        | 61.80  |
| <b>α-Xylose (α-X)</b> | <b>CH-1</b>             | <b>5.17</b> | d        | 93.1   |
|                       | CH-6                    | 3.80        | m        | 72.5   |
|                       | CH-3                    | 3.70        | m        | 73.8   |
|                       | CH-5                    | 3.45        | m        | 70.7   |
|                       | CH-2                    | 3.35        | m        | 72.5   |
|                       | CH <sub>2</sub> -6      | 3.73-3.90   | m        | 96.9   |
| <b>β-Xylose (β-X)</b> | <b>CH-1</b>             | <b>4.56</b> | d        | 97.0   |
|                       | CH-5                    | 3.87        | m        | 74.6   |
|                       | CH-3                    | 3.69        | m        | 76.8   |
|                       | CH-4                    | 3.36        | m        | 70.7   |
|                       | CH-2                    | 3.18        | m        | 75.2   |
| <b>Sucrose (S)</b>    | <b>GLC CH-1</b>         | <b>5.42</b> | <b>d</b> | 93.22  |
|                       | CH-2                    | 3.59        | m        | 72.11  |
|                       | CH-3                    | 3.79        | m        | 73.54  |
|                       | CH-4                    | 3.48        | m        | 70.26  |
|                       | CH-5                    | 3.85        | m        | 73.38  |
|                       | CH <sub>2</sub> -6      | 3.82        | m        | 61.18  |
|                       | FRU CH <sub>2</sub> -1' | 3.69        | m        | 62.44  |
|                       | C-2                     | \           | \        | 104.85 |
|                       | CH-3'                   | 4.22        | m        | 77.45  |
|                       | CH-4'                   | 4.06        | m        | 75.04  |
|                       | CH-5'                   | 3.90        | m        | 82.44  |
|                       | CH <sub>2</sub> -6      | 3.82        | m        | 63.38  |
| <b>Raffinose (R)</b>  | CH-1 Glucose            | 5.45        | d        | 96.41  |
|                       | CH-2 G                  | 3.55        | dd       | 73.69  |
|                       | CH-3 G                  | 3.74        | dd       | 75.34  |
|                       | CH-4 G                  | 3.53        | dd       | 72.05  |
|                       | CH-5 G                  | 4.05        | m        | 74.11  |
|                       | CH <sub>2</sub> -6 G    | 4.69-4.02   | m        | 68.37  |
|                       | <b>CH-1 Galactose</b>   | <b>5.01</b> | <b>d</b> | 101.08 |
|                       | CH-2 g                  | 3.82        | dd       | 71.03  |
|                       | CH-3 g                  | 3.89        | dd       | 72.04  |

|                                    |                                                                |             |          |                |
|------------------------------------|----------------------------------------------------------------|-------------|----------|----------------|
|                                    | CH-4 g                                                         | 3.98        | dd       | 83.88          |
|                                    | CH-5 g                                                         | 3.95        | m        | 73.71          |
|                                    | CH2-6 g                                                        | 3.73        | m        | 63.72          |
|                                    | CH-1 Fructose                                                  | 3.67        | s        | 64.01          |
|                                    | C-2 F                                                          | /           | /        | 104.88         |
|                                    | CH-3 F                                                         | 4.22        | d        | 79.00          |
|                                    | CH-4                                                           | 4.05        | dd       | 79.69          |
|                                    | CH-5                                                           | 3.88        | m        | 83.98          |
|                                    | CH2-6                                                          | 3.77-3.82   | m        | 65.05          |
| <b><u>Lipids &amp; Sterols</u></b> |                                                                |             |          |                |
| <b>Stearic acid (SFA)</b>          | CH <sub>3</sub>                                                | 0.87        | t        | 14.05          |
|                                    | n-CH <sub>2</sub>                                              | 1.26        | m        | 29.32          |
|                                    | CH <sub>2</sub> -CH <sub>2</sub> -CO <sub>2</sub> <sup>-</sup> | 1.62        | m        | 24.61          |
|                                    | <b>CH<sub>2</sub>-CO<sub>2</sub><sup>-</sup></b>               | <b>2.30</b> | <b>t</b> | 33.52          |
| <b>Linoleic acid (ω-6)</b>         | CH <sub>3</sub>                                                | 0.86        | t        | 14.06          |
|                                    | n-CH <sub>2</sub>                                              | 1.36        | m        | 29.37          |
|                                    | CH <sub>2</sub> -CH=CH                                         | 2.04        | m        | 29.45          |
|                                    | CH=CH                                                          | 5.37        | m        | 130.29; 128.45 |
|                                    | <b>=CH-CH<sub>2</sub>-CH=</b>                                  | <b>2.76</b> | <b>t</b> | 25.68          |
|                                    | CH <sub>2</sub> -CH <sub>2</sub> -CO <sub>2</sub> <sup>-</sup> | 2.06        | m        | 24.75          |
|                                    | CH <sub>2</sub> -CO <sub>2</sub> <sup>-</sup>                  | 2.31        | t        | 34.05          |
| <b>β-Sitosterol (β-ST)</b>         | CH <sub>2</sub> -1                                             | 1.08, 1.85  | m        | 37.19          |
|                                    | CH <sub>2</sub> -2                                             | 1.51, 1.84  | m        | 31.50          |
|                                    | CHOH-3                                                         | 3.52        | m        | 71.81          |
|                                    | CH <sub>2</sub> -4                                             | 2.28        | m        | 42.37          |
|                                    | CH-6                                                           | 5.34        | m        | 121.79         |
|                                    | CH <sub>2</sub> -7                                             | 1.52, 1.98  | m        | 31.98          |
|                                    | CH-8                                                           | 1.46        | m        | 31.78          |
|                                    | CH-14                                                          | 0.99        | m        | 56.74          |
|                                    | CH <sub>2</sub> -15                                            | 1.57        | m        | 24.25          |
|                                    | CH <sub>2</sub> -16                                            | 1.26, 1.85  | m        | 28.37          |
|                                    | <b>CH<sub>3</sub>-18</b>                                       | <b>0.68</b> | <b>s</b> | 12.20          |
|                                    | CH <sub>3</sub> -25                                            | 1.01        | s        | 19.12          |
| <b>Campsterol (Camp)</b>           | CH <sub>2</sub> -1                                             | 1.08, 1.85  | m        | 37.19          |

|                                                        |                                                                                    |                                       |                           |                                      |
|--------------------------------------------------------|------------------------------------------------------------------------------------|---------------------------------------|---------------------------|--------------------------------------|
|                                                        | CH <sub>2</sub> -2                                                                 | 1.51, 1.84                            | m                         | 31.50                                |
|                                                        | CHOH-3                                                                             | 3.52                                  | m                         | 71.81                                |
|                                                        | CH <sub>2</sub> -4                                                                 | 2.28                                  | m                         | 42.37                                |
|                                                        | CH-6                                                                               | 5.34                                  | m                         | 121.79                               |
|                                                        | CH <sub>2</sub> -7                                                                 | 1.52, 1.98                            | m                         | 31.98                                |
|                                                        | CH-8                                                                               | 1.46                                  | m                         | 31.78                                |
|                                                        | CH-14                                                                              | 0.99                                  | m                         | 56.74                                |
|                                                        | CH <sub>2</sub> -15                                                                | 1.57                                  | m                         | 24.25                                |
|                                                        | CH <sub>2</sub> -16                                                                | 1.26, 1.85                            | m                         | 28.37                                |
|                                                        | <b>CH<sub>3</sub>-18</b>                                                           | <b>0.70</b>                           | <b>s</b>                  | 12.21                                |
|                                                        | CH <sub>3</sub> -25                                                                | 1.01                                  | s                         | 19.12                                |
| <b><u>Miscellaneous Metabolites</u></b>                |                                                                                    |                                       |                           |                                      |
| <b>Choline (Chn)</b>                                   | <b>N(CH<sub>3</sub>)<sub>3</sub></b>                                               | <b>3.20</b>                           | <b>s</b>                  | 56.70                                |
| <b>Betaine (Bet)</b>                                   | <b>N-(CH<sub>3</sub>)<sub>3</sub></b><br>CH <sub>2</sub>                           | <b>3.26</b><br>3.84                   | <b>s</b><br>s             | 55.95<br>68.58                       |
| <b>Trigonelline (Trg)</b>                              | N-CH <sub>3</sub><br>CH <sub>4</sub><br>CH <sub>3</sub> ,5<br><b>CH1</b>           | 4.42<br>8.07<br>8.82<br><b>9.11</b>   | s<br>m<br>m<br><b>s</b>   | 51.1<br>130.4<br>148.5<br>148.1      |
| <b>Uracile (Ur)</b>                                    | <b>CH-5</b><br>CH-6                                                                | <b>5.92</b><br>7.85                   | <b>d</b><br>d             | 103.7<br>146.3                       |
| <b>Nicotinamide<br/>adenine dinucleotide<br/>(NAD)</b> | <b>CH-2</b><br>CH-4<br>CH-6<br>CH-5                                                | <b>9.45</b><br>9.21<br>8.95<br>8.48   | <b>s</b><br>dd<br>dd<br>m | 151.42<br>153.25<br>138.89<br>126.84 |
| <b>Monoacylglycerol<br/>(MAG)</b>                      | <b>CH<sub>2</sub></b><br>CH <sub>2</sub><br>CH                                     | <b>3.65-3,55</b><br>4.05-4.15<br>3.82 | <b>dd</b><br>dd<br>m      | 65.45<br>70.32<br>75.12              |
| <b>Phospholipids (PP)</b>                              | CH<br><b>2CH<sub>2</sub></b>                                                       | <b>5.13-5.21</b><br>4.15-4.29         | bm<br>dd                  | 77.45<br>68.23                       |
| <b>Carotenoids (Crt)</b>                               | CH <sub>2</sub> -2,2'<br>CH <sub>2</sub> -3,3'<br>CH <sub>2</sub> -4,4'<br>CH-7,7' | 1.47<br>1.62<br>2.02<br>6.15          | m<br>m<br>m<br>d          | 39.62<br>19.27<br>33.18<br>126.68    |

|                          |                                |             |          |        |
|--------------------------|--------------------------------|-------------|----------|--------|
|                          | CH-8,8'                        | 6.14        | d        | 137.78 |
|                          | CH-10,10'                      | 6.14        | d        | 130.88 |
|                          | <b>CH-11,11'</b>               | <b>6.68</b> | <b>m</b> | 125.04 |
|                          | CH-12,12'                      | 6.35        | d        | 137.26 |
|                          | CH-14,14'                      | 6.25        | d        | 132.45 |
|                          | CH-15,15'                      | 6.63        | m        | 130.02 |
|                          | CH <sub>3</sub> -16,16',17,17' | 1.03        | s        | 29.01  |
|                          | CH <sub>3</sub> -18,18'        | 1.72        | s        | 21.77  |
|                          | CH <sub>3</sub> -19,19'        | 1.97        | s        | 12.81  |
| <b>Total Chlorofylls</b> | CH-5                           | 9.57        | s        | 137.6  |
|                          | CH-10                          | 9.22        | s        | 108.2  |
|                          | <b>CH-20</b>                   | <b>8.41</b> | <b>s</b> | 93.4   |

In bold are evidenced the resonances chosen for metabolite quantification; s: singlet, d: doublet, t: triplet, q: quadruplet, dd: doublet of doublets, m: multiplet, bm: broad multiplet.
